# Supplementary material for: nurP28, a New-to-Nature Zein-Derived Peptide, Enhances the Therapeutic Effect of Docetaxel in Breast Cancer Monolayers and Spheroids
Source: MDPI journal article supplement (doi:10.3390/molecules27092824), 2022-04-29
Supplement: s1 [file s1]

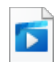

Secondary Structure  
of nurP28 peptide.mp

**Video S1.** Secondary structure of nurP28 peptide.

The 22-KDa  $\alpha$ -zein sequence analysis by TMHMM Server v.2.0 resulted in only a peak for transmembrane trend probability (Figure S1). This peak, located between the amino acids 6-25, showed a probability value  $> 0.9$ . A short region composed by the first five amino acid of the  $\alpha$ -zein sequence was predicted to be located inside the cell. The remaining 26 to 266 amino acids were located outside the cell with a probability  $\sim 1.0$ .

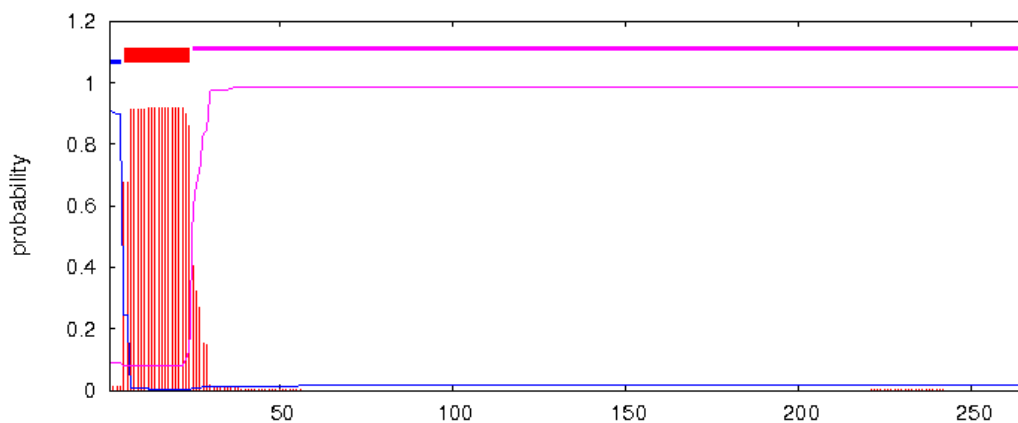

**Figure S1.** Transmembrane trend probability for 22-KDa  $\alpha$ -zein amino acid sequence obtained by TMHMM Server v.2.0

An additional amino acid analysis was performed on PROTEUS Structure Prediction Server 2.0 (Figure S2).

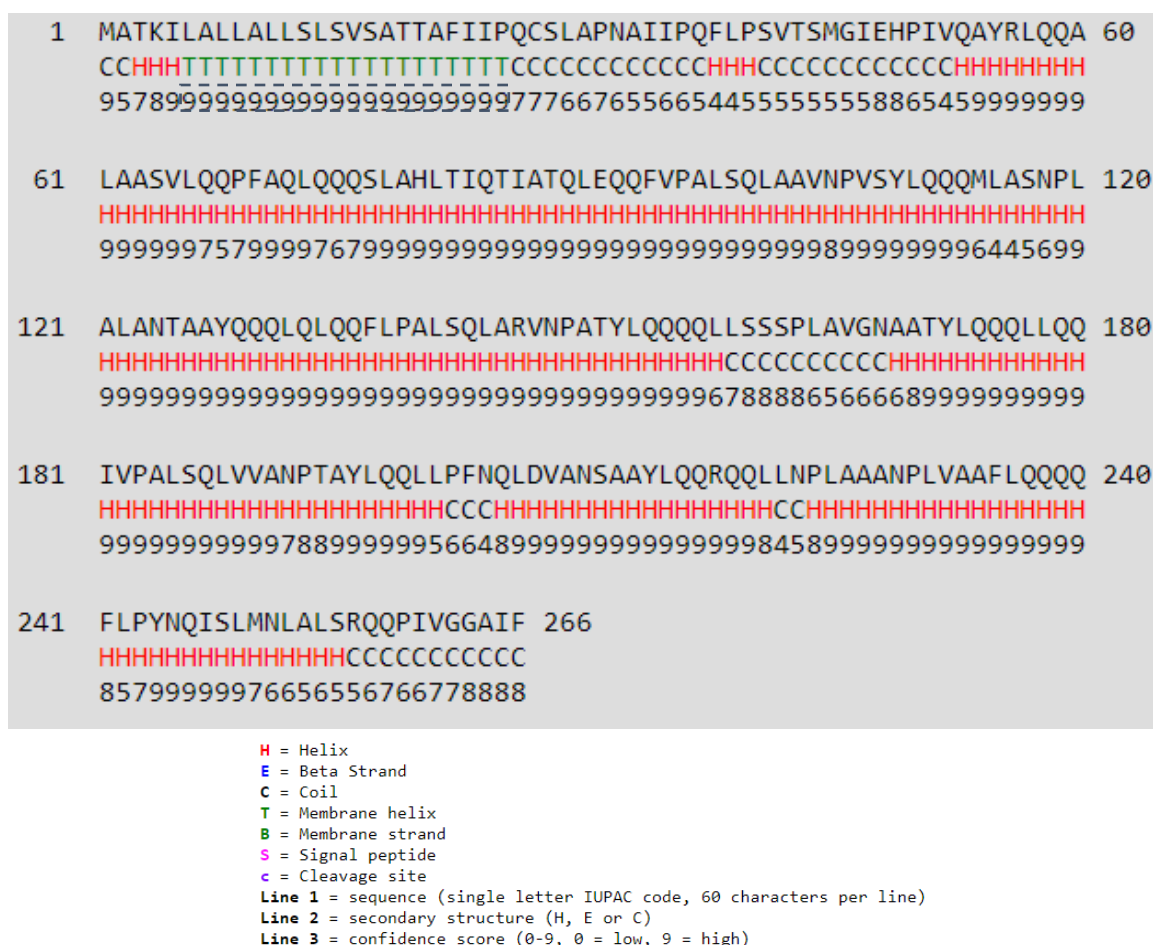

**Figure S2.** Predicted transmembrane, and secondary structures for  $\alpha$ -zein, obtained by PROTEUS Structure Prediction Server 2.0

The results exhibited a sole transmembrane region conformed by 20 amino acid within the  $\alpha$ -zein sequence, located between the amino acids 6 to 25. Leucine (30%), alanine (20%), valine (5%), phenylalanine (5%), isoleucine (10%), and proline (5%), all hydrophobic amino acids, composed 75% of the sequence. Serine (15%), and threonine (10%), polar amino acids, conformed the remaining part of the region. No charged amino acid was found within such region. Additionally, helix-forming trends were observed between the amino acids 53 to 158, 168 to 202, 206 to 223, and 226 to 255.

**Table S1.** Fluorescence readings (FU) and normalized metabolic activities (NMA %) of BJ fibroblast cells.

| Treatment                        | FU   | NMA %   |
|----------------------------------|------|---------|
| Control                          | 2986 | 101.051 |
| Control                          | 2976 | 100.701 |
| Control                          | 2960 | 100.175 |
| Control                          | 2955 | 100.000 |
| Control                          | 2950 | 99.825  |
| Control                          | 2948 | 99.772  |
| Control                          | 2943 | 99.586  |
| Control                          | 2934 | 99.299  |
| Control                          | 2929 | 99.124  |
| DTX 10 $\mu$ M                   | 2339 | 79.159  |
| DTX 10 $\mu$ M                   | 2350 | 79.510  |
| DTX 10 $\mu$ M                   | 2370 | 80.210  |
| DTX 10 $\mu$ M                   | 2401 | 81.261  |
| DTX 10 $\mu$ M                   | 2417 | 81.786  |
| DTX 10 $\mu$ M                   | 2417 | 81.786  |
| DTX 10 $\mu$ M                   | 2422 | 81.961  |
| DTX 10 $\mu$ M                   | 2474 | 83.713  |
| DTX 10 $\mu$ M                   | 2531 | 85.639  |
| DTX 1 $\mu$ M                    | 2557 | 86.515  |
| DTX 1 $\mu$ M                    | 2603 | 88.091  |
| DTX 1 $\mu$ M                    | 2639 | 89.317  |
| DTX 1 $\mu$ M                    | 2774 | 93.870  |
| DTX 1 $\mu$ M                    | 2803 | 94.860  |
| DTX 1 $\mu$ M                    | 2827 | 95.671  |
| DTX 1 $\mu$ M                    | 2842 | 96.177  |
| DTX 1 $\mu$ M                    | 2867 | 97.023  |
| DTX 1 $\mu$ M                    | 2933 | 99.266  |
| nurP28 3 ng/mL                   | 2771 | 93.763  |
| nurP28 3 ng/mL                   | 2810 | 95.096  |
| nurP28 3 ng/mL                   | 2831 | 95.797  |
| nurP28 3 ng/mL                   | 2851 | 96.497  |
| nurP28 3 ng/mL                   | 2867 | 97.038  |
| nurP28 3 ng/mL                   | 2914 | 98.599  |
| nurP28 3 ng/mL                   | 2939 | 99.475  |
| nurP28 3 ng/mL                   | 3002 | 101.576 |
| nurP28 3 ng/mL                   | 3053 | 103.327 |
| nurP28 3 ng/mL + DTX 1 $\mu$ M   | 2635 | 89.155  |
| nurP28 3 ng/mL + DTX 1 $\mu$ M   | 2732 | 92.469  |
| nurP28 3 ng/mL + DTX 1 $\mu$ M   | 2784 | 94.221  |
| nurP28 3 ng/mL + DTX 1 $\mu$ M   | 2862 | 96.848  |
| nurP28 3 ng/mL + DTX 1 $\mu$ M   | 2862 | 96.848  |
| nurP28 3 ng/mL + DTX 1 $\mu$ M   | 2872 | 97.198  |
| nurP28 3 ng/mL + DTX 1 $\mu$ M   | 2883 | 97.548  |
| nurP28 3 ng/mL + DTX 1 $\mu$ M   | 2888 | 97.723  |
| nurP28 3 ng/mL + DTX 1 $\mu$ M   | 2893 | 97.898  |
| nurP28 300 ng/mL                 | 3121 | 105.604 |
| nurP28 300 ng/mL                 | 3172 | 107.356 |
| nurP28 300 ng/mL                 | 3183 | 107.706 |
| nurP28 300 ng/mL                 | 3224 | 109.107 |
| nurP28 300 ng/mL                 | 3229 | 109.282 |
| nurP28 300 ng/mL                 | 3255 | 110.158 |
| nurP28 300 ng/mL                 | 3400 | 115.061 |
| nurP28 300 ng/mL                 | 3457 | 116.988 |
| nurP28 300 ng/mL                 | 3617 | 122.417 |
| nurP28 300 ng/mL + DTX 1 $\mu$ M | 2547 | 86.201  |
| nurP28 300 ng/mL + DTX 1 $\mu$ M | 2625 | 88.818  |
| nurP28 300 ng/mL + DTX 1 $\mu$ M | 2679 | 90.657  |
| nurP28 300 ng/mL + DTX 1 $\mu$ M | 2743 | 92.820  |
| nurP28 300 ng/mL + DTX 1 $\mu$ M | 2815 | 95.271  |
| nurP28 300 ng/mL + DTX 1 $\mu$ M | 2872 | 97.198  |
| nurP28 300 ng/mL + DTX 1 $\mu$ M | 2950 | 99.825  |
| nurP28 300 ng/mL + DTX 1 $\mu$ M | 2965 | 100.350 |
| nurP28 300 ng/mL + DTX 1 $\mu$ M | 2976 | 100.701 |

**Table S2.** Fluorescence readings (FU) and normalized metabolic activities (NMA %) of MCF7 monolayers.

| Treatment                       | FU   | NMA %   |
|---------------------------------|------|---------|
| Control                         | 3818 | 107.882 |
| Control                         | 3548 | 100.253 |
| Control                         | 3478 | 98.275  |
| Control                         | 3574 | 100.988 |
| Control                         | 3805 | 107.515 |
| Control                         | 3577 | 101.073 |
| Control                         | 3383 | 95.591  |
| Control                         | 3455 | 97.625  |
| Control                         | 3213 | 90.787  |
| 10 $\mu$ M DTX                  | 2850 | 80.530  |
| 10 $\mu$ M DTX                  | 2859 | 80.770  |
| 10 $\mu$ M DTX                  | 3349 | 94.616  |
| 10 $\mu$ M DTX                  | 3092 | 87.368  |
| 10 $\mu$ M DTX                  | 3316 | 93.698  |
| 10 $\mu$ M DTX                  | 2871 | 81.124  |
| 10 $\mu$ M DTX                  | 3071 | 86.775  |
| 10 $\mu$ M DTX                  | 2862 | 80.869  |
| 10 $\mu$ M DTX                  | 2850 | 80.530  |
| 1 $\mu$ M DTX                   | 3039 | 85.871  |
| 1 $\mu$ M DTX                   | 2755 | 77.846  |
| 1 $\mu$ M DTX                   | 3436 | 97.088  |
| 1 $\mu$ M DTX                   | 3295 | 93.104  |
| 1 $\mu$ M DTX                   | 3239 | 91.522  |
| 1 $\mu$ M DTX                   | 3275 | 92.539  |
| 1 $\mu$ M DTX                   | 3236 | 91.437  |
| 1 $\mu$ M DTX                   | 3658 | 103.361 |
| 1 $\mu$ M DTX                   | 3216 | 90.872  |
| 3ng/mL nurP28                   | 3675 | 103.842 |
| 3ng/mL nurP28                   | 3664 | 103.531 |
| 3ng/mL nurP28                   | 3737 | 105.594 |
| 3ng/mL nurP28                   | 4023 | 113.675 |
| 3ng/mL nurP28                   | 3737 | 105.594 |
| 3ng/mL nurP28                   | 3751 | 105.989 |
| 3ng/mL nurP28                   | 3739 | 105.650 |
| 3ng/mL nurP28                   | 3892 | 109.973 |
| 3ng/mL nurP28                   | 3847 | 108.702 |
| 3ng/mL nurP28 + 1 $\mu$ M DTX   | 3259 | 92.087  |
| 3ng/mL nurP28 + 1 $\mu$ M DTX   | 3098 | 87.538  |
| 3ng/mL nurP28 + 1 $\mu$ M DTX   | 3277 | 92.596  |
| 3ng/mL nurP28 + 1 $\mu$ M DTX   | 3255 | 91.974  |
| 3ng/mL nurP28 + 1 $\mu$ M DTX   | 3217 | 90.900  |
| 3ng/mL nurP28 + 1 $\mu$ M DTX   | 3300 | 93.246  |
| 3ng/mL nurP28 + 1 $\mu$ M DTX   | 3130 | 88.442  |
| 3ng/mL nurP28 + 1 $\mu$ M DTX   | 3441 | 97.230  |
| 3ng/mL nurP28 + 1 $\mu$ M DTX   | 3188 | 90.081  |
| 300ng/mL nurP28                 | 3746 | 105.848 |
| 300ng/mL nurP28                 | 3960 | 111.895 |
| 300ng/mL nurP28                 | 3858 | 108.998 |
| 300ng/mL nurP28                 | 4060 | 114.720 |
| 300ng/mL nurP28                 | 3780 | 106.809 |
| 300ng/mL nurP28                 | 3763 | 106.328 |
| 300ng/mL nurP28                 | 3515 | 99.321  |
| 300ng/mL nurP28                 | 3708 | 104.774 |
| 300ng/mL nurP28                 | 3621 | 102.316 |
| 300ng/mL nurP28 + 1 $\mu$ M DTX | 2758 | 77.931  |
| 300ng/mL nurP28 + 1 $\mu$ M DTX | 3008 | 84.995  |
| 300ng/mL nurP28 + 1 $\mu$ M DTX | 2755 | 77.846  |
| 300ng/mL nurP28 + 1 $\mu$ M DTX | 2809 | 79.372  |
| 300ng/mL nurP28 + 1 $\mu$ M DTX | 2850 | 80.530  |
| 300ng/mL nurP28 + 1 $\mu$ M DTX | 2859 | 80.785  |
| 300ng/mL nurP28 + 1 $\mu$ M DTX | 2971 | 83.949  |
| 300ng/mL nurP28 + 1 $\mu$ M DTX | 3107 | 87.792  |
| 300ng/mL nurP28 + 1 $\mu$ M DTX | 3332 | 94.150  |

**Table S3.** Fluorescence readings (FU) and normalized metabolic activities (NMA %) of spheroids at 120 h.

| Treatment                 | FU   | NMA %   |
|---------------------------|------|---------|
| Control                   | 3550 | 99.485  |
| Control                   | 3832 | 107.389 |
| Control                   | 3574 | 100.167 |
| Control                   | 3384 | 94.852  |
| Control                   | 3384 | 94.852  |
| Control                   | 3394 | 95.124  |
| Control                   | 3467 | 97.168  |
| Control                   | 3739 | 104.800 |
| Control                   | 3788 | 106.163 |
| 10µM DTX                  | 2597 | 72.774  |
| 10µM DTX                  | 2665 | 74.682  |
| 10µM DTX                  | 2704 | 75.772  |
| 10µM DTX                  | 2665 | 74.682  |
| 10µM DTX                  | 2650 | 74.273  |
| 10µM DTX                  | 2572 | 72.093  |
| 10µM DTX                  | 2572 | 72.093  |
| 10µM DTX                  | 3034 | 85.039  |
| 10µM DTX                  | 3097 | 86.811  |
| 1µM DTX                   | 2665 | 74.682  |
| 1µM DTX                   | 2650 | 74.273  |
| 1µM DTX                   | 3229 | 90.491  |
| 1µM DTX                   | 2815 | 78.907  |
| 1µM DTX                   | 2849 | 79.861  |
| 1µM DTX                   | 3214 | 90.082  |
| 1µM DTX                   | 2898 | 81.224  |
| 1µM DTX                   | 2956 | 82.859  |
| 1µM DTX                   | 2553 | 71.548  |
| 3ng/mL nurP28             | 3457 | 96.896  |
| 3ng/mL nurP28             | 3540 | 99.213  |
| 3ng/mL nurP28             | 3326 | 93.216  |
| 3ng/mL nurP28             | 3360 | 94.170  |
| 3ng/mL nurP28             | 3316 | 92.944  |
| 3ng/mL nurP28             | 3355 | 94.034  |
| 3ng/mL nurP28             | 3438 | 96.351  |
| 3ng/mL nurP28             | 3535 | 99.076  |
| 3ng/mL nurP28             | 3613 | 101.257 |
| 3ng/mL nurP28 + 1µM DTX   | 2786 | 78.089  |
| 3ng/mL nurP28 + 1µM DTX   | 2811 | 78.770  |
| 3ng/mL nurP28 + 1µM DTX   | 2990 | 83.813  |
| 3ng/mL nurP28 + 1µM DTX   | 3029 | 84.903  |
| 3ng/mL nurP28 + 1µM DTX   | 2723 | 76.317  |
| 3ng/mL nurP28 + 1µM DTX   | 2893 | 81.087  |
| 3ng/mL nurP28 + 1µM DTX   | 2961 | 82.995  |
| 3ng/mL nurP28 + 1µM DTX   | 2864 | 80.270  |
| 3ng/mL nurP28 + 1µM DTX   | 2830 | 79.316  |
| 300ng/mL nurP28           | 3273 | 91.717  |
| 300ng/mL nurP28           | 3258 | 91.308  |
| 300ng/mL nurP28           | 3073 | 86.130  |
| 300ng/mL nurP28           | 3122 | 87.492  |
| 300ng/mL nurP28           | 3093 | 86.675  |
| 300ng/mL nurP28           | 3676 | 103.028 |
| 300ng/mL nurP28           | 3773 | 105.754 |
| 300ng/mL nurP28           | 3584 | 100.439 |
| 300ng/mL nurP28           | 3627 | 101.666 |
| 300ng/mL nurP28 + 1µM DTX | 2067 | 57.919  |
| 300ng/mL nurP28 + 1µM DTX | 2105 | 59.010  |
| 300ng/mL nurP28 + 1µM DTX | 2426 | 68.004  |
| 300ng/mL nurP28 + 1µM DTX | 2164 | 60.645  |
| 300ng/mL nurP28 + 1µM DTX | 1974 | 55.330  |
| 300ng/mL nurP28 + 1µM DTX | 2402 | 67.323  |
| 300ng/mL nurP28 + 1µM DTX | 2373 | 66.505  |
| 300ng/mL nurP28 + 1µM DTX | 2514 | 70.457  |
| 300ng/mL nurP28 + 1µM DTX | 2563 | 71.820  |

**Table S4.** Glucose readings of spheroids culture media at 0, 24, 72 and 120 hours.

| Treatment                 | Glucose [mg·mL <sup>-1</sup> ] |      |      |       |
|---------------------------|--------------------------------|------|------|-------|
|                           | 0 h                            | 24 h | 72 h | 120 h |
| Control                   | 85                             | 86   | 79   | 67    |
| Control                   | 86                             | 86   | 78   | 62    |
| Control                   | 95                             | 82   | 78   | 67    |
| Control                   | 84                             | 86   | 81   | 75    |
| Control                   | 86                             | 87   | 78   | 72    |
| Control                   | 83                             | 79   | 81   | 70    |
| Control                   | 83                             | 82   | 75   | 64    |
| Control                   | 89                             | 87   | 80   | 73    |
| Control                   | 87                             | 83   | 79   | 71    |
| 10µM DTX                  | 85                             | 80   | 81   | 83    |
| 10µM DTX                  | 86                             | 86   | 77   | 75    |
| 10µM DTX                  | 79                             | 81   | 78   | 78    |
| 10µM DTX                  | 86                             | 80   | 82   | 82    |
| 10µM DTX                  | 86                             | 84   | 83   | 84    |
| 10µM DTX                  | 86                             | 83   | 83   | 80    |
| 10µM DTX                  | 86                             | 85   | 78   | 75    |
| 10µM DTX                  | 84                             | 86   | 76   | 75    |
| 10µM DTX                  | 80                             | 84   | 78   | 78    |
| 1µM DTX                   | 85                             | 85   | 77   | 79    |
| 1µM DTX                   | 86                             | 83   | 79   | 76    |
| 1µM DTX                   | 86                             | 80   | 80   | 75    |
| 1µM DTX                   | 80                             | 77   | 80   | 73    |
| 1µM DTX                   | 83                             | 84   | 79   | 75    |
| 1µM DTX                   | 85                             | 81   | 78   | 76    |
| 1µM DTX                   | 85                             | 81   | 76   | 77    |
| 1µM DTX                   | 86                             | 81   | 84   | 78    |
| 1µM DTX                   | 85                             | 81   | 81   | 82    |
| 3ng/mL nurP28             | 85                             | 85   | 77   | 66    |
| 3ng/mL nurP28             | 86                             | 84   | 83   | 69    |
| 3ng/mL nurP28             | 84                             | 82   | 76   | 69    |
| 3ng/mL nurP28             | 86                             | 82   | 75   | 67    |
| 3ng/mL nurP28             | 86                             | 81   | 79   | 69    |
| 3ng/mL nurP28             | 88                             | 84   | 77   | 69    |
| 3ng/mL nurP28             | 85                             | 85   | 76   | 71    |
| 3ng/mL nurP28             | 84                             | 81   | 78   | 69    |
| 3ng/mL nurP28             | 83                             | 82   | 76   | 68    |
| 3ng/mL nurP28 + 1µM DTX   | 85                             | 85   | 86   | 87    |
| 3ng/mL nurP28 + 1µM DTX   | 86                             | 88   | 85   | 90    |
| 3ng/mL nurP28 + 1µM DTX   | 86                             | 88   | 87   | 81    |
| 3ng/mL nurP28 + 1µM DTX   | 86                             | 88   | 80   | 78    |
| 3ng/mL nurP28 + 1µM DTX   | 85                             | 84   | 82   | 77    |
| 3ng/mL nurP28 + 1µM DTX   | 87                             | 78   | 79   | 78    |
| 3ng/mL nurP28 + 1µM DTX   | 84                             | 80   | 78   | 77    |
| 3ng/mL nurP28 + 1µM DTX   | 85                             | 78   | 81   | 79    |
| 3ng/mL nurP28 + 1µM DTX   | 82                             | 82   | 82   | 80    |
| 300ng/mL nurP28           | 85                             | 83   | 72   | 68    |
| 300ng/mL nurP28           | 86                             | 81   | 78   | 64    |
| 300ng/mL nurP28           | 82                             | 84   | 72   | 63    |
| 300ng/mL nurP28           | 86                             | 81   | 73   | 67    |
| 300ng/mL nurP28           | 79                             | 81   | 80   | 72    |
| 300ng/mL nurP28           | 82                             | 84   | 77   | 71    |
| 300ng/mL nurP28           | 83                             | 80   | 81   | 71    |
| 300ng/mL nurP28           | 86                             | 84   | 77   | 73    |
| 300ng/mL nurP28           | 86                             | 83   | 78   | 70    |
| 300ng/mL nurP28 + 1µM DTX | 85                             | 82   | 81   | 82    |
| 300ng/mL nurP28 + 1µM DTX | 86                             | 80   | 80   | 79    |
| 300ng/mL nurP28 + 1µM DTX | 81                             | 81   | 78   | 79    |
| 300ng/mL nurP28 + 1µM DTX | 76                             | 79   | 84   | 84    |
| 300ng/mL nurP28 + 1µM DTX | 81                             | 79   | 82   | 82    |
| 300ng/mL nurP28 + 1µM DTX | 77                             | 80   | 78   | 74    |
| 300ng/mL nurP28 + 1µM DTX | 80                             | 78   | 76   | 75    |
| 300ng/mL nurP28 + 1µM DTX | 79                             | 80   | 76   | 77    |
| 300ng/mL nurP28 + 1µM DTX | 83                             | 79   | 81   | 77    |
